# Supplementary material
Source: publisher site journal article supplement (https://www.dovepress.com/article/448483)
Supplement: Supplementary file 1 [file get_supplementary_file.php]

# Supplementary Material

1. **Supplementary Tables**

**Supplementary Table 1 Clinical studies on the research of SCT for ED**

| Year | First author | Location | Trail ID | Cause | Number of patients | Intervention | Route | Follow-up time, months | Outcome | SAE |
| --- | --- | --- | --- | --- | --- | --- | --- | --- | --- | --- |
| 2022 | Koga S1 | Japan | NA | Multifactor | 38 | At least 3 consecutive SHED‐CM | ICI | NA | IIEF-5↑ | No |
| 2021 | Mirzaei M2 | Iran | IRCT20190517043609N1 | DM | 20 | 10 for OM-MSCs, 10 for normal saline | ICI | 6 | IIEF-5↑ | No |
| 2021 | You D3 | Korea | NCT02344849 | DM/CNI | 5/5 | BMSCs | ICI | 12 | IIEF-5↑ | No |
| 2021 | Al Demour S4 | Jordan | NCT02945449 | DM | 22 | 2 consecutive WJ-MSCs | ICI | 12 | IIEF-5 and EHS ↑ | No |
| 2021 | von Schwarz, ER5 | USA | NCT04684602 | Multifactor | 26 | 20 for HUCMSCs-derived bioactive molecules, 6 for normal saline | ICI | 6 | IIEF-5↑ | No |
| 2020 | Ory J6 | USA | NCT01087996/ NCT00768066/ NCT02013674 | ED with cardiomyopathy | 36 | 28 for BMSCs/ BMMNCs, 8 for placebo | Transendocardial injection | 12 | IIEF↑ | Similar between 2 groups |
| 2020 | Protogerou V7 | Greece | NA | Multifactor | 5 | 5 for ADSCs suspended in PL | ICI | 6 | IIEF-5↑ | No |
| 2018 | Haahr MK8 | Denmark | NCT02240823 | CNI | Continent: 15  Incontinent: 6 | ADRCs | ICI | 12 | Continent: IIEF-5, EHS↑  Incontinent: unchanged | No |
| 2018 | Al Demour S9 | Jordan | NCT02945462 | DM | 4 | 2 consecutive BMSCs | ICI | 12 | IIEF-15, EHS↑ | No |
| 2017 | Liu, KF10 | China | NA | Multifactor | 17 | CD133 stem cells | ICI | 12 | IIEF-5↑ | No |
| 2017 | Yiou R11 | France | NCT01089387 | CNI | 12 in stage I  6 in stage II | BMMNCs | ICI | 62  6 | IIEF-15↑ | No |
| 2016 | Yiou R12 | France | NCT01089387 | CNI | 12 | BMMNCs | ICI | 6 | IIEF-15, EHS↑ | No |
| 2016 | Haahr MK13 | Denmark | NCT02240823 | CNI | Continent: 11  Incontinent: 6 | ADRCs | ICI | 6 | Continent: IIEF-5, EHS↑  Incontinent: not regain | No |
| 2016 | Levy JA14 | USA | NCT02398370 | Multifactor | 8 | PM-MSCs | ICI | 6 | PSV↑, IIEF unchanged | No |
| 2010 | Bahk JY15 | Korea | NA | DM | 10 | 7 for UCBSCs, 3 for normal saline | ICI | 9 | IIEF-5↑ | No |

SCT, stem cell therapy; ED, erectile dysfunction; SAE, severe adverse events; NA, not available; SHED‐CM, the cultured conditioned medium of stem cells from human exfoliated deciduous teeth; ICI, intracavernous injection; IIEF, international index of erectile function; DM, diabetes mellitus; OM-MSCs, oral mucosa-derived mesenchymal stem cells; CNI, cavernous nerve injury; BMSCs, bone marrow-derived mesenchymal stem cells; WJ-MSCs, Wharton’s jelly-derived mesenchymal stem cells; HUCMSCs, human umbilical cord mesenchymal stem cells; BMMNCs, bone marrow mononuclear cells; ADSCs, adipose-derived mesenchymal stem cells; PL, platelet lysate; ADRCs, adipose-derived regenerative cells; PM-MSCs, placental matrix-derived mesenchymal stem cells; PSV, peak systolic velocity; UCBSCs, umbilical cord blood stem cells.

**References**

1. Koga S, Horiguchi Y. Efficacy of a cultured conditioned medium of exfoliated deciduous dental pulp stem cells in erectile dysfunction patients. *J Cell Mol Med.* 2022;26(1):195-201.

2. Mirzaei M, Bagherinasabsarab M, Pakmanesh H, et al. The Effect of Intracavernosal Injection of Stem Cell in the Treatment of Erectile Dysfunction in Diabetic Patients: A Randomized Single-blinded Clinical Trial. *Urology journal.* 2021;18(6):675-681.

3. You D, Jang MJ, Song G, et al. Safety of autologous bone marrow-derived mesenchymal stem cells in erectile dysfunction: an open-label phase 1 clinical trial. *Cytotherapy.* 2021;23(10):931-938.

4. Al Demour S, Adwan S, Jafar H, Rahmeh R, Alhawari H, Awidi A. Safety and Efficacy of 2 Intracavernous Injections of Allogeneic Wharton's Jelly-Derived Mesenchymal Stem Cells in Diabetic Patients with Erectile Dysfunction: Phase 1/2 Clinical Trial. *Urologia internationalis.* 2021;105(11-12):935-943.

5. von Schwarz ER, Busse N, Angelus KM, Omair A, von Schwarz AA, Bogaardt PC. Intracavernous injection of stem cell-derived bioactive molecules for erectile dysfunction-a pilot phase non-randomized controlled trial. *Journal of Mens Health.* 2021;17(4):99-108.

6. Ory J, Saltzman RG, Blachman-Braun R, et al. The Effect of Transendocardial Stem Cell Injection on Erectile Function in Men With Cardiomyopathy: Results From the TRIDENT, POSEIDON, and TAC-HFT Trials. *J Sex Med.* 2020;17(4):695-701.

7. Protogerou V, Beshari SE, Michalopoulos E, et al. The Combined Use of Stem Cells and Platelet Lysate Plasma for the Treatment of Erectile Dysfunction: A Pilot Study-6 Months Results. *Medicines (Basel).* 2020;7(3).

8. Haahr MK, Harken Jensen C, Toyserkani NM, et al. A 12-Month Follow-up After a Single Intracavernous Injection of Autologous Adipose-Derived Regenerative Cells in Patients with Erectile Dysfunction Following Radical Prostatectomy: An Open-Label Phase I Clinical Trial. *Urology.* 2018;121:203 e206-203 e213.

9. Al Demour S, Jafar H, Adwan S, et al. Safety and Potential Therapeutic Effect of Two Intracavernous Autologous Bone Marrow Derived Mesenchymal Stem Cells injections in Diabetic Patients with Erectile Dysfunction: An Open Label Phase I Clinical Trial. *Urologia internationalis.* 2018;101(3):358-365.

10. Liu KF, Yu HT, Zhang CW, Zhu CH. Using CD133 stem cells to therapy the erectile dysfunction (ED) by corpus cavernosum angiography surgery. *Biomedical Research-India.* 2017;28(11):4883-4885.

11. Yiou R, Hamidou L, Birebent B, et al. Intracavernous Injections of Bone Marrow Mononucleated Cells for Postradical Prostatectomy Erectile Dysfunction: Final Results of the INSTIN Clinical Trial. *Eur Urol Focus.* 2017;3(6):643-645.

12. Yiou R, Hamidou L, Birebent B, et al. Safety of Intracavernous Bone Marrow-Mononuclear Cells for Postradical Prostatectomy Erectile Dysfunction: An Open Dose-Escalation Pilot Study. *Eur Urol.* 2016;69(6):988-991.

13. Haahr MK, Jensen CH, Toyserkani NM, et al. Safety and Potential Effect of a Single Intracavernous Injection of Autologous Adipose-Derived Regenerative Cells in Patients with Erectile Dysfunction Following Radical Prostatectomy: An Open-Label Phase I Clinical Trial. *EBioMedicine.* 2016;5:204-210.

14. Levy JA, Marchand M, Iorio L, Cassini W, Zahalsky MP. Determining the Feasibility of Managing Erectile Dysfunction in Humans With Placental-Derived Stem Cells. *J Am Osteopath Assoc.* 2016;116(1):e1-5.

15. Bahk JY, Jung JH, Han H, Min SK, Lee YS. Treatment of diabetic impotence with umbilical cord blood stem cell intracavernosal transplant: preliminary report of 7 cases. *Exp Clin Transplant.* 2010;8(2):150-160.
